# Supplementary material for: Identification of FABP5 as an immunometabolic marker in human hepatocellular carcinoma
Source: PubMed Central journal article supplement (PMC7332195; doi:10.1136/jitc-2019-000501), 2020-07-01
Supplement: jitc-2019-000501supp004.pdf [file jitc-2019-000501supp004.pdf]

**Table S3. Representative genes and functional description listed for each cluster of HCC.**

| Cluster No. | Tag           | Representative genes       | Functional description                    |
|-------------|---------------|----------------------------|-------------------------------------------|
| 0           | C0-CD8-GZMA   | GZMA,IFNG,TIGIT,NKG7,PDCD1 | Cytotoxic and partially exhausted T cells |
| 1           | C1-CD4-CD44   | IL7R,CD69,LTB,CD44         | Activated T cells                         |
| 2           | C2-CD4-CD40LG | IL7R,CD69,CD40LG,KLRG1     | T helper cells                            |
| 3           | C3-CD4-FOXP3  | TIGIT,FOXP3,CTLA4,IL2RA    | Treg                                      |
| 4           | C4-CD8-CXCL13 | CXCL13,PDCD1,CD27,CTLA4    | Exhausted cells                           |
| 5           | C5-CD8-GNLY   | GNLY,GZMA,NKG7,PRF1        | Effector T cells                          |
| 6           | C6-PCNA       | PCNA,MKI67,STMN1           | Proliferating T cells                     |
| 7           | C7-CD68       | CD68,C1QA,SERPINA1         | Natural killer T cells                    |

To generate a comprehensive view of the infiltrated T cells ecosystem of HCC, we applied single cell RNA sequencing on 8047 sorted CD3<sup>+</sup>CD45RO<sup>+</sup> cells from the HCC adjacent non-cancerous tissue (ANT) and tumor core (TM). *CD8A* and *IL-7R* were used as markers to classify CD8<sup>+</sup> or CD4<sup>+</sup> T cells. To reveal the intrinsic structure and potential functional subtypes of the overall T cell populations, we performed unsupervised clustering of all T cells using spectral clustering. A total of 8 stable clusters emerged from the integrated data. We named each cluster and compared genes expression.
