# Supplementary material for: Identification of FABP5 as an immunometabolic marker in human hepatocellular carcinoma
Source: PubMed Central journal article supplement (PMC7332195; doi:10.1136/jitc-2019-000501), 2020-07-01

## Supplemental Figure S4

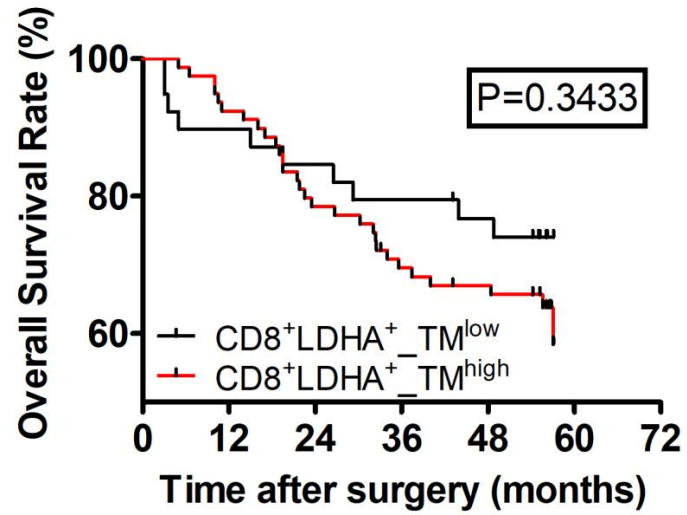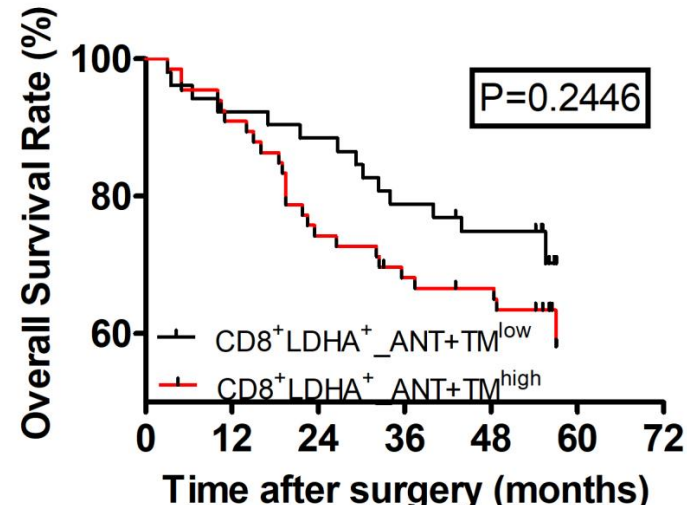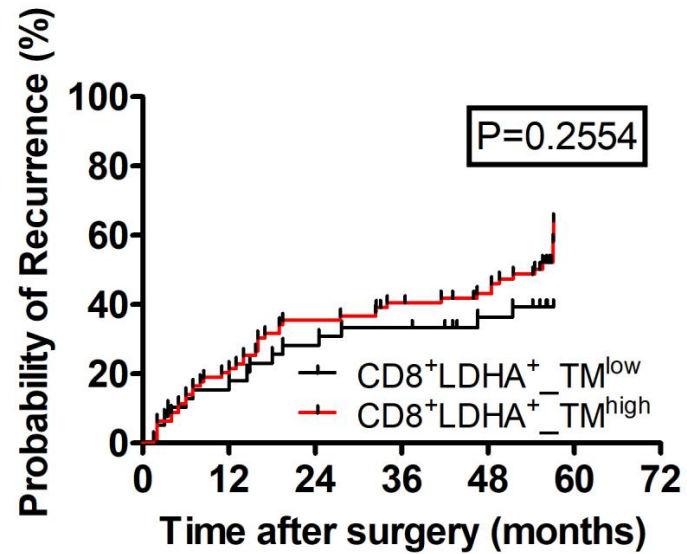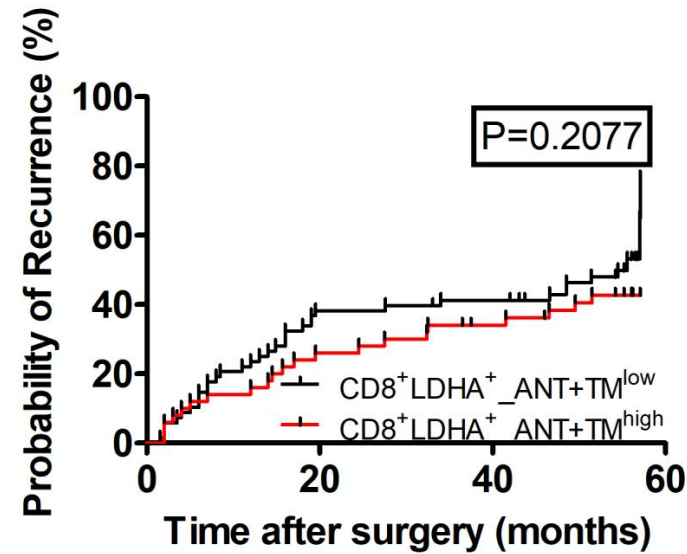

Supplement: jitc-2019-000501supp007.pdf [file jitc-2019-000501supp007.pdf]
